# Supplementary material for: An apical protein, Pcr2, is required for persistent movement by the human parasite Toxoplasma gondii
Source: PubMed Central journal article supplement (PMC9436145; doi:10.1371/journal.ppat.1010776), 2022-08-22
Supplement: ppat.1010776.s010.pdf [file ppat.1010776.s010.pdf]

**S2 Fig**

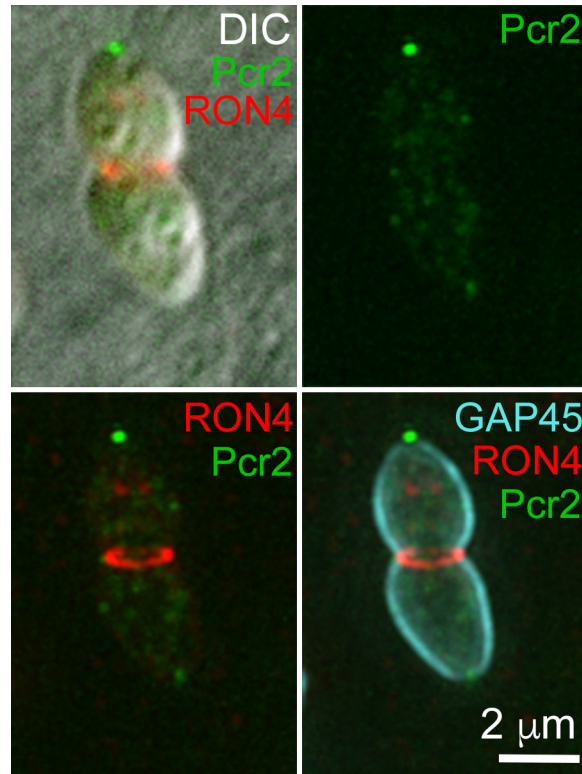

**S2 Fig.** DIC and projections of deconvolved wide-field fluorescence images of an invading *Pcr2-mNeonGreen* 3' tag parasite (green), in which the moving junction (anti-RON4, red), and the parasite cortex (anti-GAP45, cyan) were labeled by immunofluorescence.
