# Supplementary material for: An apical protein, Pcr2, is required for persistent movement by the human parasite Toxoplasma gondii
Source: PubMed Central journal article supplement (PMC9436145; doi:10.1371/journal.ppat.1010776), 2022-08-22
Supplement: ppat.1010776.s011.pdf [file ppat.1010776.s011.pdf]

S3 Fig

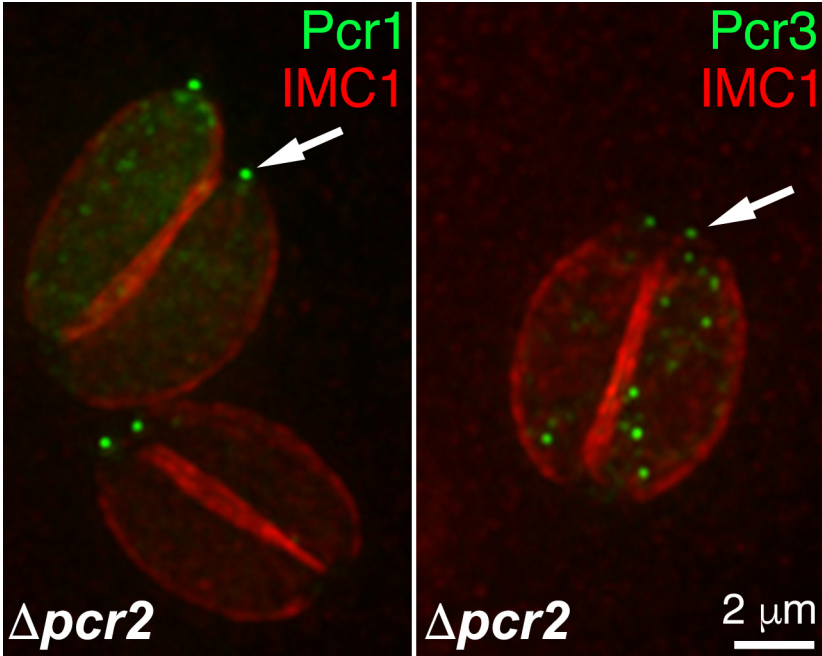

**S3 Fig.** Ectopically expressed Pcr1 and Pcr3 are found at the apex (arrows) of the  $\Delta pcr2$  parasites. The expression of mEmeraldFP (green) tagged Pcr1 and Pcr3 was driven by a *T. gondii* tubulin promoter. The parasites were labeled by an anti-IMC1 antibody (red) to highlight the parasite cortex.
