# Supplementary material for: An apical protein, Pcr2, is required for persistent movement by the human parasite Toxoplasma gondii
Source: PLoS Pathog. 2022 Aug 22;18(8):e1010776. doi: 10.1371/journal.ppat.1010776 (PMC9436145; doi:10.1371/journal.ppat.1010776)
Supplement: S1 Fig — Residues predicted to form alpha-helices (pLDDT>70) are highlighted in green. (PDF) [file ppat.1010776.s009.pdf]

## S1 Fig

### TgPcr2 sequence and predicted structure

```

1 MWSLLGFSEESPPEESQDATAASPPTPSHQDVPASPSATEGKEVAGVASS
51 ASPETMADAPSDSPPATPTSGGGFWSFWGASTPAEAEPATTPVSSTAAA
101 VETPDSGISETPGPSGVSSSAESGGDEKQKKKKKESGKGGEAVAEKKK
151 KKKSEKGGEMVAEKKKGSEEMSSKLVS GSDVEAFRARLEQIELOKKAK
201 EEAKVKRKEDEKKQKEEKREQRGREREEREKKKQKEEAARI AELKRLEEE
251 LKRIOELAELEKQNEERKNKRKGDRGESSRGSSSSPSSGRSRREASEE
301 RRKAREEREKRRREEQAGLEELLEATERELTETARSLQESI DROREERE
351 LERRRQAQVKREMI RQLAEFATRALEAQQAARAAAAPAPPGASKGQPP
401 APSLVSPADVKARNFVALIKRDGGPSLPPPELEQRRLAEPARGETSGAK
451 AEDRQAPELSRKGAAAPTAGRVLAEETEVTEGDESMLRPFLAKRGDSVGDE
501 YQEAQYTQQHVIFRGPAFRAFHLELVNATKEINHLEQVEAASRDEEETIT
551 LREHLOTLLDKETKNSESHLERACAIROALNSISIVFRAAQRRKTLFET
601 KLNAAGAAMPRAVGTSAALRAILGGDSKVTRLGVGLLREVVLRHLRQAW
651 NQWTRYVVKPRDAPPGRGAGTGIGTLEDEKATAAIMALREVEDEAEALKKY
701 NEEEKRKLAEVASRLERWRRQLVAAHDAVIHLRENETKRCKSGVREKERG
751 DRRRPRTSSTLDSAEDDACAPDVLTRLNALVHTEMHRLGLRFENPRAGFG
801 GDSTPHLETRNRDPFRRIPRSFQTENIGHLRLLHGDANGSFEDRLSSFL
851 ESRTSDNGSVRSARGRGVRRRRSLDENGKALSGTESDTSVSESISSGR
901 SSSTSSESGALSSSEKRRASSRMSENGENPSRRNNTVDEGRRKKNFDKAC
951 EDAEITHDLAPATRGQPSKSGDQASSQVSVVKGTLPASRIVKTRPKPPPP
1001 PGASEPATFGGGQQRKLQPASGTETSQDDLESAPSTRSSCSGKGPKGTGTA
1051 PTGSTVIYADAHHTOASAKAKNAVOAKVKMERDRORTATIVVGAGPPI LA
1101 PKSLVNGPKSGPKPKQ

```

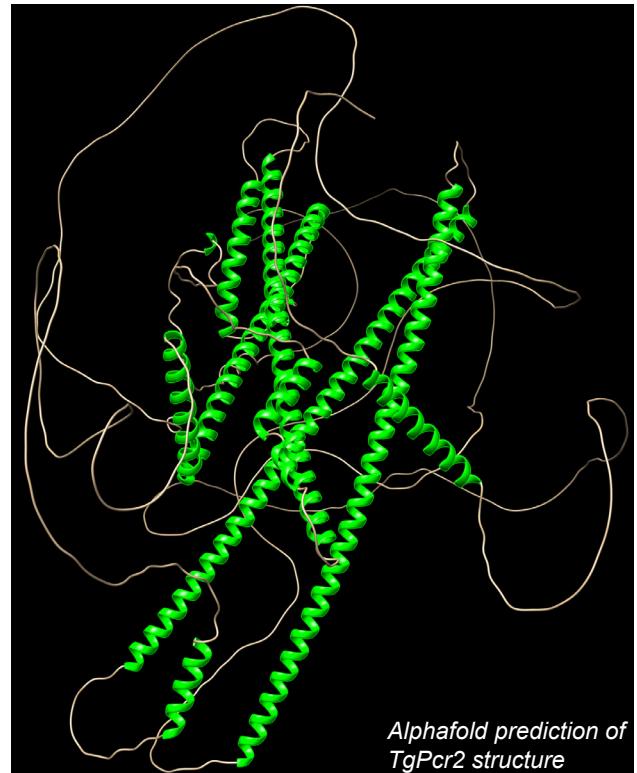

**S1 Fig.** Pcr2 sequence and AlphaFold prediction of Pcr2 structure. Residues predicted to form alpha-helices (pLDDT>70) are highlighted in green.
